# Supplementary material for: Machine Learning–Guided Adjuvant Treatment of Head and Neck Cancer
Source: PubMed Central journal article supplement (PMC7677764; doi:10.1001/jamanetworkopen.2020.25881), 2020-11-19

## Supplemental Online Content

Howard FM, Kochanny S, Koshy M, Spiotto M, Pearson AT. Machine learning–guided adjuvant treatment of head and neck cancer. *JAMA Netw Open*. 2020;3(11):e2025881.  
doi:10.1001/jamanetworkopen.2020.25881

**eTable 1.** Optimal Hyperparameters, DeepSurv and N-MTLR Models

**eTable 2.** Optimal Hyperparameters, Random Survival Forest

**eTable 3.** Missing Values for Features in the Final Data Set, Prior to Imputation

**eTable 4.** Permutation Feature Importance

**eTable 5.** Hazard Ratios for Subgroups

**eFigure.** Survival Outcomes for Treatment According to Machine Learning Model Recommendations, Test Cohort

This supplemental material has been provided by the authors to give readers additional information about their work.

**eTable 1. Optimal Hyperparameters, DeepSurv and N-MTLR Models**

| <b>Parameter</b>                                               | <b>DeepSurv Model</b>                                                                                  | <b>N-MTLR Model</b>                                             |
|----------------------------------------------------------------|--------------------------------------------------------------------------------------------------------|-----------------------------------------------------------------|
| <b>Neural Network Structure<br/>(Layer: activation; nodes)</b> | 1: LeCun Tanh; 64<br>2: Sinc; 128<br>3: Log Sigmoid; 32<br>4: Inverse Square Root; 128<br>5: Swish; 16 | 1: Sinc; 32<br>2: Sigmoid; 32<br>3: Log Log; 8<br>4: Arc Tan; 8 |
| <b>Learning Rate</b>                                           | 0.00001                                                                                                | 0.0001                                                          |
| <b>Number of Epochs</b>                                        | 6000                                                                                                   | 4000                                                            |
| <b>Dropout</b>                                                 | 0.1                                                                                                    | 0.1                                                             |
| <b>L2 Regularization</b>                                       | 0.0001                                                                                                 | 0.001                                                           |
| <b>Batch Normalization</b>                                     | False                                                                                                  | False                                                           |
| <b>L2 Smoothing Regularization</b>                             |                                                                                                        | 0.001                                                           |
| <b>Bins</b>                                                    |                                                                                                        | 100                                                             |

**eTable 2. Optimal Hyperparameters, Random Survival Forest**

| <b>Parameter</b>           | <b>Random Survival Forest Model</b> |
|----------------------------|-------------------------------------|
| <b>Trees</b>               | 80                                  |
| <b>Max Features</b>        | 0.1                                 |
| <b>Max Depth</b>           | 40                                  |
| <b>Min Node Size</b>       | 80                                  |
| <b>Sample Size Percent</b> | 60%                                 |
| <b>Importance Mode</b>     | Permutation                         |

**eTable 3. Missing Values for Features in the Final Data Set, Prior to Imputation**

|                                                                  | <b>Number Missing (% Total)</b> |
|------------------------------------------------------------------|---------------------------------|
| <b>Gender</b>                                                    | 0 (0)                           |
| <b>Age</b>                                                       | 0 (0)                           |
| <b>Year of Diagnosis</b>                                         | 0 (0)                           |
| <b>Ethnicity</b>                                                 | 279 (0.8)                       |
| <b>Academic Center</b>                                           | 1,199 (3.6)                     |
| <b>Charlson/Deyo Score</b>                                       | 0 (0)                           |
| <b>Status At Last Contact</b>                                    | 0 (0)                           |
| <b>Primary Site</b>                                              | 0 (0)                           |
| <b>Tumor stage</b>                                               | 0 (0)                           |
| <b>Nodal Stage</b>                                               | 0 (0)                           |
| <b>Measured Tumor Size</b>                                       | 5,027 (15.0)                    |
| <b>Tumor Thickness (n, % of oral cavity cancers)<sup>a</sup></b> | 9,670 (61.1)                    |
| <b>Differentiation</b>                                           | 2,518 (7.5)                     |
| <b>LVI</b>                                                       | 15,969 (47.6)                   |
| <b>Lymph Nodes Positive</b>                                      | 4,465 (13.3)                    |
| <b>Lymph Node Levels Involved</b>                                |                                 |
| I, II, III                                                       | 2,211 (6.6)                     |
| IV, V, Retropharyngeal                                           | 2,269 (6.8)                     |
| Parapharyngeal                                                   | 2,227 (6.6)                     |
| <b>HPV Positivity<sup>b</sup></b>                                |                                 |
| Oropharynx                                                       | 5,972 (53.5)                    |

|                                                                |               |
|----------------------------------------------------------------|---------------|
| Non-oropharynx                                                 | 18,182 (81.3) |
| <b>Multiagent Chemotherapy</b>                                 | 1,581 (0)     |
| <b>Time from Surgery to Completion of RT</b>                   | 1,508 (4.7)   |
| <b>RT Dose</b>                                                 | 0 (0)         |
| <b>Adequate Lymph Node Dissection<br/>(18+ Nodes Examined)</b> | 79 (0.2)      |

<sup>a</sup>For tumor thickness, percent missing is calculated as a percentage of oral cavity cancers

<sup>b</sup>For HPV positivity, percent missing values are calculated as a percentage of total oropharynx cancers, and as a percentage of total non-oropharynx cancers.

**eTable 4. Permutation Feature Importance**

**Given as % decrease in concordance index with permutation.** A high reduction in concordance index with variable permutation indicates that feature is important in prediction of prognosis.

| <b>Feature</b>                                             | <b>DeepSurv</b> | <b>N-MTLR</b> | <b>RSF</b> | <b>Average</b> |
|------------------------------------------------------------|-----------------|---------------|------------|----------------|
| <b>Life Expectancy</b>                                     | 4.0922          | 4.4706        | 4.5369     | 4.3666         |
| <b>Year of Diagnosis 2013 - 2016</b>                       | 2.4761          | 1.5635        | 2.8574     | 2.299          |
| <b>Tumor Stage T4</b>                                      | 2.3638          | 2.0986        | 0.6507     | 1.7044         |
| <b>HPV+ (Oropharynx)</b>                                   | 1.157           | 1.0594        | 1.4945     | 1.237          |
| <b>Tonsillar Subsite</b>                                   | 0.8495          | 1.2884        | 0.921      | 1.0196         |
| <b>5-9 Lymph Nodes Positive</b>                            | 1.4671          | 0.5078        | 0.5448     | 0.8399         |
| <b>Tumor Size</b>                                          | 0.4326          | 0.1226        | 1.644      | 0.7331         |
| <b>2-4 Lymph Nodes Positive</b>                            | 0.656           | 0.729         | 0.2707     | 0.5519         |
| <b>10+ Lymph Nodes Positive</b>                            | 0.8419          | 0.6268        | 0.126      | 0.5316         |
| <b>Tongue Subsite</b>                                      | 0.6829          | 0.7121        | 0.0724     | 0.4892         |
| <b>Tumor Stage T3</b>                                      | 0.7585          | 0.6258        | 0.0643     | 0.4828         |
| <b>Charlson/Dayo Score 0-1</b>                             | 0.6489          | 0.4133        | 0.1649     | 0.409          |
| <b>HPV+ (Non-oropharynx)</b>                               | 0.4005          | -0.048        | 0.6712     | 0.3414         |
| <b>Level II Lymph Nodes Involved</b>                       | 0.1787          | 0.3874        | 0.3788     | 0.315          |
| <b>Larynx primary</b>                                      | 0.1357          | 0.5185        | 0.1998     | 0.2847         |
| <b>Floor of Mouth Subsite</b>                              | 0.2739          | 0.4239        | 0.1008     | 0.2662         |
| <b>Nodal Stage N2</b>                                      | 0.2095          | 0.4524        | 0.00498    | 0.2223         |
| <b>Adequate Lymph Node Dissection (18+ Nodes Examined)</b> | 0.3122          | 0.227         | 0.12       | 0.2197         |

|                                                                            |          |          |          |        |
|----------------------------------------------------------------------------|----------|----------|----------|--------|
| <b>Time from Surgery to Completion of Adjuvant Treatment &gt; 100 Days</b> | 0.4894   | -0.00636 | 0.1667   | 0.2166 |
| <b>Level I Lymph Nodes Involved</b>                                        | 0.2214   | 0.2486   | 0.1676   | 0.2125 |
| <b>Base of Tongue Subsite</b>                                              | 0.1352   | 0.3989   | 0.0103   | 0.1815 |
| <b>Received Chemo</b>                                                      | 0.2981   | 0.2099   | -0.00742 | 0.1669 |
| <b>Buccal Mucosa Subsite</b>                                               | 0.2326   | 0.1229   | -0.00064 | 0.1183 |
| <b>Nodal Stage N1</b>                                                      | 0.071    | 0.1966   | 0.039    | 0.1022 |
| <b>Male Gender</b>                                                         | 0.2082   | 0.0606   | 0.029    | 0.0993 |
| <b>Alveolar Ridge Subsite</b>                                              | 0.0516   | 0.2616   | -0.039   | 0.0915 |
| <b>Nodal Stage N3</b>                                                      | 0.0645   | 0.2072   | 0.00155  | 0.0911 |
| <b>Retromolar Trigone Subsite</b>                                          | 0.0963   | 0.1469   | 0.0208   | 0.088  |
| <b>Well Differentiated</b>                                                 | -0.00415 | 0.2316   | 0.0115   | 0.0797 |
| <b>Radiation Dose</b>                                                      | -0.015   | -0.032   | 0.2644   | 0.0723 |
| <b>Lymphovascular Invasion</b>                                             | -0.0024  | 0.1139   | 0.0554   | 0.0556 |
| <b>Treatment at Academic Center</b>                                        | 0.0538   | 0.0991   | 0.0106   | 0.0545 |
| <b>1 Lymph Node Positive</b>                                               | 0.1959   | -0.061   | -0.00494 | 0.0434 |
| <b>Moderately Differentiated</b>                                           | 0.0406   | -0.021   | 0.0912   | 0.0368 |
| <b>Black Race</b>                                                          | 0.00727  | 0.0638   | 0.0278   | 0.0329 |
| <b>Multiagent Chemotherapy</b>                                             | 0.0628   | 0.0387   | -0.00352 | 0.0327 |
| <b>Retropharyngeal Lymph Nodes Involved</b>                                | 0.0337   | 0.0527   | -0.00041 | 0.0287 |
| <b>Hypopharynx primary</b>                                                 | -0.08    | 0.1568   | -0.00887 | 0.0228 |
| <b>Parapharyngeal Lymph Nodes Involved</b>                                 | 0.0587   | -0.019   | 0        | 0.0133 |
| <b>Tumor Thickness (Depth)</b>                                             | 0.0645   | 0.0146   | -0.04    | 0.0129 |

|                                       |         |          |        |          |
|---------------------------------------|---------|----------|--------|----------|
| <b>Level IV Lymph Nodes Involved</b>  | 0.0858  | -0.122   | 0.0695 | 0.0112   |
| <b>Year of Diagnosis 2009 - 2012</b>  | -0.0127 | -0.00885 | 0.0287 | 0.00237  |
| <b>Poorly Differentiated</b>          | -0.054  | 0.0304   | 0.0249 | 0.000514 |
| <b>Level III Lymph Nodes Involved</b> | 0.0672  | -0.23    | 0.1524 | -0.00361 |
| <b>Level V Lymph Nodes Involved</b>   | -0.077  | 0.0299   | 0.0322 | -0.0049  |



**eTable 5. Hazard Ratios for Subgroups**

Hazard ratios are calculated for survival of patients receiving treatment recommended by a model compared to those who did not.

| <b>HR (95% CI)</b> | <b>HPV+ Oropharynx</b> | <b>HPV-</b>        | <b>Age &gt; 70</b> | <b>Age ≤ 70</b>    |
|--------------------|------------------------|--------------------|--------------------|--------------------|
| <b>DeepSurv</b>    | 0.95 (0.53 – 1.69)     | 0.79 (0.63– 1.00)  | 0.74 (0.62 – 0.89) | 0.87 (0.79– 0.95)  |
| <b>N-MLTR</b>      | 0.67 (0.66 – 1.04)     | 0.83 (0.66 – 1.04) | 0.86 (0.71 – 1.03) | 0.89 (0.81 – 0.98) |
| <b>RSF</b>         | 0.46 (0.25 – 0.84)     | 0.80 (0.64 – 1.01) | 0.89 (0.74 – 1.06) | 0.93 (0.84 – 1.02) |

**eFigure. Survival Outcomes for Treatment According to Machine Learning Model Recommendations, Test Cohort**

**Top – DeepSurv Model, Middle – N-MLTR Model, Bottom – RSF Model.**

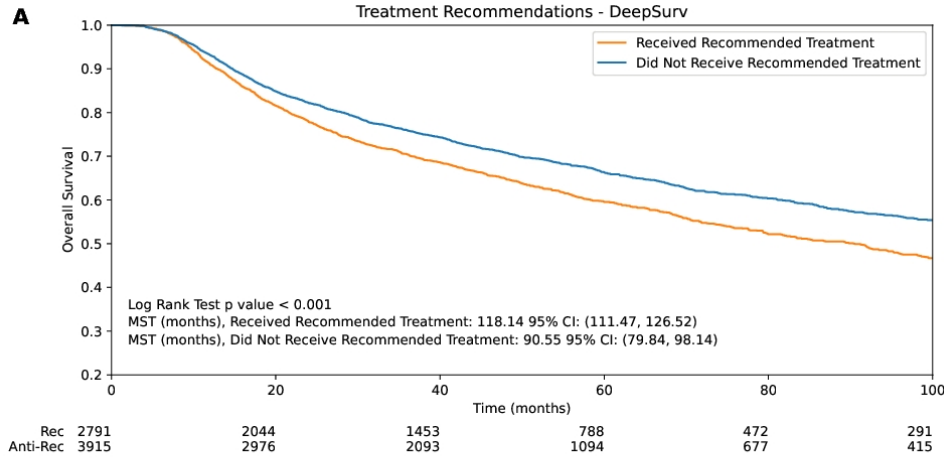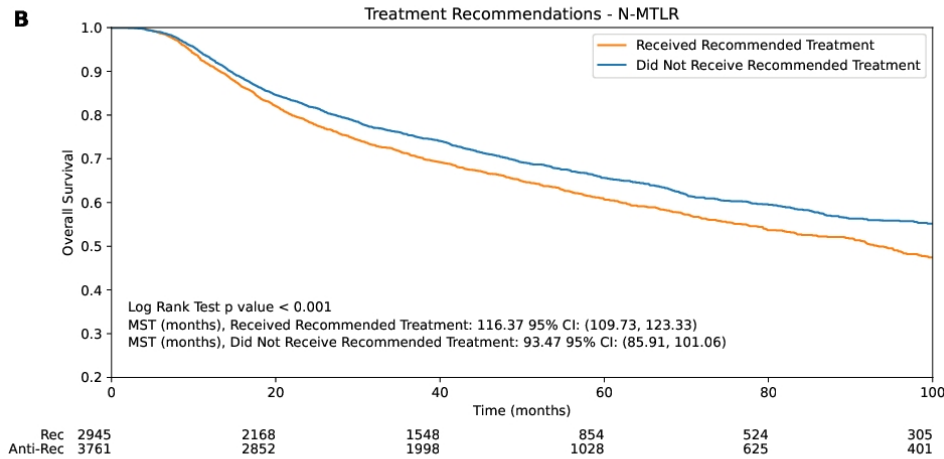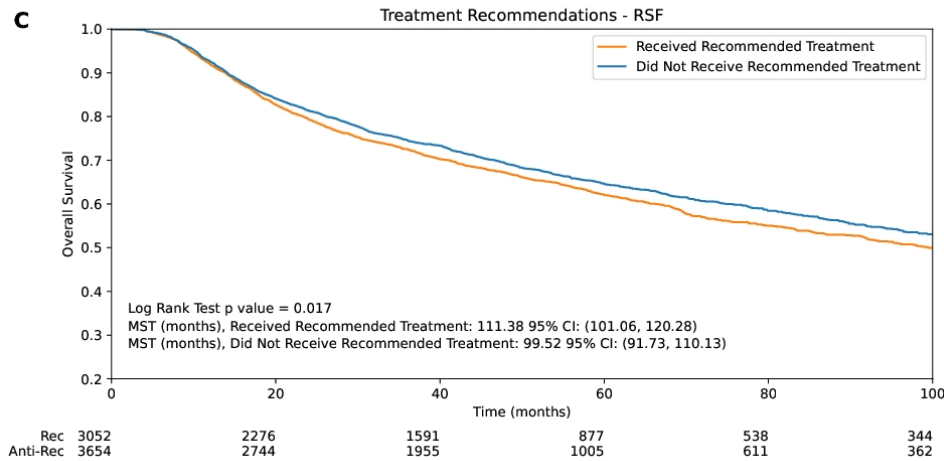

Supplement: jamanetwopen-e2025881-s001.pdf [file jamanetwopen-e2025881-s001.pdf]
